# Supplementary material for: Inflammatory Biomarkers Are Associated With a Decline in Functional Status at Discharge in Children With Acute Respiratory Failure: An Exploratory Analysis
Source: PubMed Central journal article supplement — Crit Care Explor. 2021 Jul 13;3(7):e0467. doi: 10.1097/CCE.0000000000000467 (PMC8280074; doi:10.1097/cce.0000000000000467), 2021-07-13
Supplement: cc9-3-e0467-s001.pdf [file cc9-3-e0467-s001.pdf]

## Online Supplement

- eTable 1: Multivariable Analysis of the Association of IL-1ra and Thrombomodulin with Decline in Functional Outcome, Adjusting for PRISM III
- eTable 2: Multivariable Analysis of the Association of IL-1ra and Thrombomodulin with Decline in Functional Outcome, Adjusting for Sepsis Diagnosis
- eTable 3: Multivariable Analysis of the Association of IL-1ra and Thrombomodulin with Decline in Functional Outcome, Adjusting for Cardiovascular and Respiratory Dysfunction

**eTable1. Multivariable Analysis of the Association of IL-1ra and Thrombomodulin with Decline in Functional Outcome, Adjusting for PRISM III**

|                       | Change in Pediatric Overall Performance Category |             |         |
|-----------------------|--------------------------------------------------|-------------|---------|
|                       | Odds Ratio                                       | 95% CI      | p-value |
| <b>IL-1RA</b>         |                                                  |             |         |
| Day 1                 |                                                  |             |         |
| IL-1ra                | 0.98                                             | (0.66,1.45) | 0.90    |
| Age                   | 1.05                                             | (0.96,1.14) | 0.27    |
| PRISM                 | 1.08                                             | (1.01,1.16) | 0.02    |
| Day 2                 |                                                  |             |         |
| IL-1ra                | 1.29                                             | (0.92,1.81) | 0.15    |
| Age                   | 1.08                                             | (1.01,1.15) | 0.02    |
| PRISM                 | 1.08                                             | (1.03,1.14) | <0.01   |
| Day 3                 |                                                  |             |         |
| IL-1ra                | 1.30                                             | (0.88,1.93) | 0.19    |
| Age                   | 1.08                                             | (1.01,1.16) | 0.02    |
| PRISM                 | 1.08                                             | (1.03,1.14) | <0.01   |
| <b>Thrombomodulin</b> |                                                  |             |         |
| Day 1                 |                                                  |             |         |
| Thrombomodulin        | 1.23                                             | (0.52,2.96) | 0.64    |
| Age                   | 1.06                                             | (0.97,1.16) | 0.17    |
| PRISM                 | 1.09                                             | (1.02,1.17) | 0.01    |
| Day 2                 |                                                  |             |         |
| Thrombomodulin        | 1.54                                             | (0.78,3.02) | 0.21    |
| Age                   | 1.08                                             | (1.01,1.16) | 0.02    |
| PRISM                 | 1.09                                             | (1.03,1.15) | <0.01   |
| Day 3                 |                                                  |             |         |
| Thrombomodulin        | 1.95                                             | (0.95,4.01) | 0.07    |
| Age                   | 1.09                                             | (1.02,1.17) | 0.01    |
| PRISM                 | 1.08                                             | (1.03,1.14) | <0.01   |

**eTable 2. Multivariable Analysis of the Association of IL-1ra and Thrombomodulin with Decline in Functional Outcome, Adjusting for Sepsis Diagnosis**

|                       | Change in Pediatric Overall Performance Category |              |         |
|-----------------------|--------------------------------------------------|--------------|---------|
|                       | Odds Ratio                                       | 95% CI       | p-value |
| <b>IL-1RA</b>         |                                                  |              |         |
| Day 1                 |                                                  |              |         |
| IL-1ra                | 0.97                                             | (0.64,1.47)  | 0.89    |
| Age                   | 1.06                                             | (0.97,1.15)  | 0.19    |
| Sepsis                | 3.65                                             | (1.19,11.16) | 0.02    |
| Day 2                 |                                                  |              |         |
| IL-1ra                | 1.44                                             | (1.04,2.00)  | 0.03    |
| Age                   | 1.10                                             | (1.03,1.17)  | <0.01   |
| Sepsis                | 1.87                                             | (0.76,4.64)  | 0.17    |
| Day 3                 |                                                  |              |         |
| IL-1ra                | 1.57                                             | (1.07,2.28)  | 0.02    |
| Age                   | 1.10                                             | (1.03,1.18)  | <0.01   |
| Sepsis                | 1.25                                             | (0.44,3.60)  | 0.68    |
| <b>Thrombomodulin</b> |                                                  |              |         |
| Day 1                 |                                                  |              |         |
| Thrombomodulin        | 1.28                                             | (0.51,3.18)  | 0.60    |
| Age                   | 1.08                                             | (0.99,1.17)  | 0.11    |
| Sepsis                | 3.64                                             | (1.15,11.52) | 0.03    |
| Day 2                 |                                                  |              |         |
| Thrombomodulin        | 1.99                                             | (1.00,3.94)  | 0.049   |
| Age                   | 1.10                                             | (1.03,1.18)  | <0.01   |
| Sepsis                | 2.00                                             | (0.80,4.99)  | 0.14    |
| Day 3                 |                                                  |              |         |
| Thrombomodulin        | 2.72                                             | (1.31,5.63)  | <0.01   |
| Age                   | 1.11                                             | (1.03,1.18)  | <0.01   |
| Sepsis                | 1.16                                             | (0.39,3.44)  | 0.79    |

**eTable 3. Multivariable Analysis of the Association of IL-1ra and Thrombomodulin with Decline in Functional Outcome, Adjusting for Cardiovascular and Respiratory Dysfunction**

|                       | Change in Pediatric Overall Performance Category |              |         |
|-----------------------|--------------------------------------------------|--------------|---------|
|                       | Odds Ratio                                       | 95% CI       | p-value |
| <b>IL-1RA</b>         |                                                  |              |         |
| <b>Day 1</b>          |                                                  |              |         |
| IL-1ra                | 0.91                                             | (0.61,1.38)  | 0.67    |
| Age                   | 1.03                                             | (0.94,1.12)  | 0.52    |
| Highest OI            | 1.01                                             | (0.98,1.05)  | 0.55    |
| CV Failure            | 5.33                                             | (1.08,26.25) | 0.04    |
| <b>Day 2</b>          |                                                  |              |         |
| IL-1ra                | 1.28                                             | (0.92, 1.80) | 0.15    |
| Age                   | 1.07                                             | (0.99,1.14)  | 0.06    |
| Highest OI            | 1.01                                             | (0.98,1.04)  | 0.51    |
| CV Failure            | 5.86                                             | (1.27,26.93) | 0.02    |
| <b>Day 3</b>          |                                                  |              |         |
| IL-1ra                | 1.43                                             | (0.96, 2.11) | 0.078   |
| Age                   | 1.07                                             | (0.99,1.14)  | 0.082   |
| Highest OI            | 1.03                                             | (0.99,1.06)  | 0.069   |
| CV Failure            | 8.07                                             | (1.01,64.37) | 0.049   |
| <b>Thrombomodulin</b> |                                                  |              |         |
| <b>Day 1</b>          |                                                  |              |         |
| Thrombomodulin        | 1.49                                             | (0.61,3.66)  | 0.39    |
| Age                   | 1.05                                             | (0.96,1.15)  | 0.28    |
| Highest OI            | 1.01                                             | (0.97,1.05)  | 0.65    |
| CV Failure            | 4.02                                             | (0.82,19.79) | 0.09    |
| <b>Day 2</b>          |                                                  |              |         |
| Thrombomodulin        | 2.03                                             | (1.03,4.00)  | 0.04    |
| Age                   | 1.07                                             | (0.99,1.14)  | 0.06    |
| Highest OI            | 1.01                                             | (0.99,1.04)  | 0.35    |
| CV Failure            | 6.42                                             | (1.43,28.80) | 0.02    |
| <b>Day 3</b>          |                                                  |              |         |
| Thrombomodulin        | 2.96                                             | (1.43,6.11)  | <0.01   |
| Age                   | 1.06                                             | (0.99,1.15)  | 0.09    |
| Highest OI            | 1.04                                             | (1.01,1.07)  | 0.02    |
| CV Failure            | 8.83                                             | (1.10,70.55) | 0.04    |
